# Supplementary material for: A systematic characterization of fibulae from Italy: from chemical composition to microstructure and corrosion processes
Source: Royal Society of Chemistry journal article supplement (doi:10.1039/c2nj40362e), 2012-10-12

**"A systematic characterization of *fibulae* from Italy: from chemical composition to microstructure and corrosion processes "**

Lorena Carla Giannossa<sup>1</sup>, Sabrina Loperfido<sup>1</sup>, Massimo Caggese<sup>2</sup>, Giuseppe Egidio De Benedetto<sup>3#</sup>, Rocco Laviano<sup>4§</sup>, Luigia Sabbatini<sup>1§</sup> and Annarosa Mangone<sup>1§\*</sup>

<sup>1</sup>Dipartimento di Chimica, Università degli Studi di Bari "Aldo Moro", via Orabona 4, 70126 Bari, Italy

<sup>2</sup> Dipartimento di Scienze dell'Antichità, Università degli Studi di Bari "Aldo Moro", Piazza Umberto I 1, 70121 Bari, Italy

<sup>3</sup> Dipartimento di Beni Culturali, Università del Salento, via Birago, 64, 73100 Lecce, Italy

<sup>4</sup> Dipartimento di Scienze della Terra e Geoambientali, Università degli Studi di Bari "Aldo Moro", via Orabona 4, 70126 Bari, Italy

<sup>4</sup> Dipartimento di Scienze dell'Antichità, Università degli Studi di Bari "Aldo Moro", Piazza Umberto I 1, 70121 Bari, Italy

§ Centro Interdipartimentale "Laboratorio di Ricerca per la Diagnostica dei Beni Culturali", via Orabona 4, 70126 Bari, Italy

# Laboratorio di Spettrometria di Massa Analitica ed Isotopica Laboratorio di Analisi Chimiche per l'Ambiente e i Beni Culturali, Campus Universitario Ecotekne, Università del Salento

---

\* Corresponding author.

E-mail address: annarosa.mangone@uniba.it (A. Mangone)

|    | Cuprite<br>Average<br>thickness (µm) | Atacamite/<br>Clinoatacamite<br>Average<br>thickness (µm) | Other<br>compounds                     | Type of patina  |
|----|--------------------------------------|-----------------------------------------------------------|----------------------------------------|-----------------|
| 1  | 150                                  | -                                                         | Tenorite                               | I               |
| 2  | <100                                 | Ata 165                                                   | Tenorite                               | II              |
| 3  | 700                                  | Ata                                                       |                                        | II/rolled layer |
| 4  | 1700                                 | Ata/Cl 300                                                |                                        | II              |
| 5  | 300                                  | Ata/Cl 800                                                |                                        | II              |
| 6  | 50                                   | Ata 1500                                                  |                                        | II              |
| 7  | 300                                  | Ata 50                                                    | Malachite                              | I               |
| 8  | 1000                                 | Ata/Cl 500                                                |                                        | II              |
| 9  | 450                                  | Cl                                                        | Cerussite,<br>Phosgenite,<br>Malachite | I               |
| 10 | <100                                 | Ata <50                                                   |                                        | I               |
| 11 | 260                                  | Ata 660                                                   | Paratacamite                           | II              |
| 12 | 1000                                 | Ata                                                       |                                        | II/rolled layer |
| 13 | 100                                  | -                                                         |                                        | I               |
| 14 | 200                                  | Ata 200                                                   |                                        | II              |
| 15 | 10                                   | -                                                         |                                        | I               |
| 16 | 200                                  | -                                                         |                                        | I               |
| 17 | 100                                  | -                                                         |                                        | I               |
| 18 | <100                                 | -                                                         |                                        | I               |
| 19 | 120                                  | Ata 120                                                   |                                        | II              |
| 20 | 1500                                 | Ata 800                                                   |                                        | II              |
| 21 | 1000                                 | Ata/Cl 320                                                |                                        | II              |

Table: Corrosion products identified by Raman Spectroscopy on *fibulae* cross sections, average thickness and type of patina (I or II) according to the classification suggested by Robbiola<sup>46</sup> (Ata= atacamite; Cl= clinoatacamite).

## LA-ICPMS Calibration curves

Mn

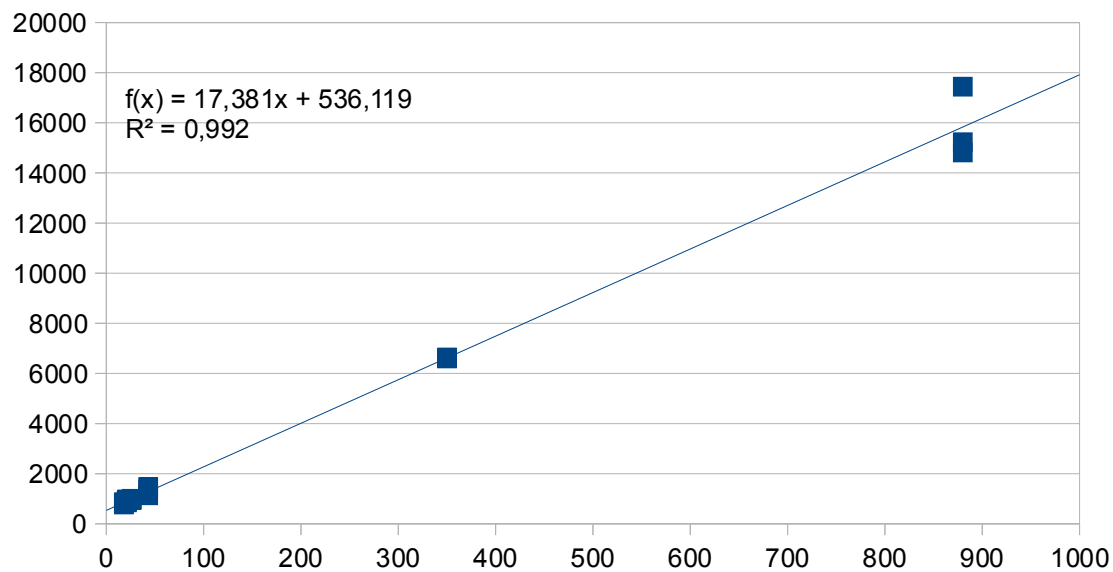

<sup>56</sup>Fe

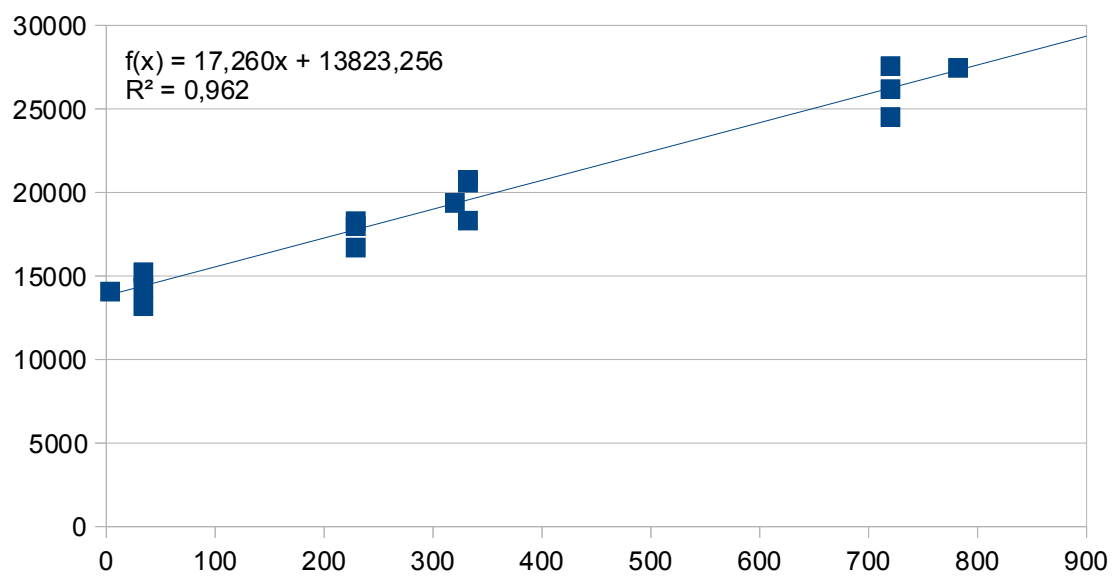

### $^{57}\text{Fe}$

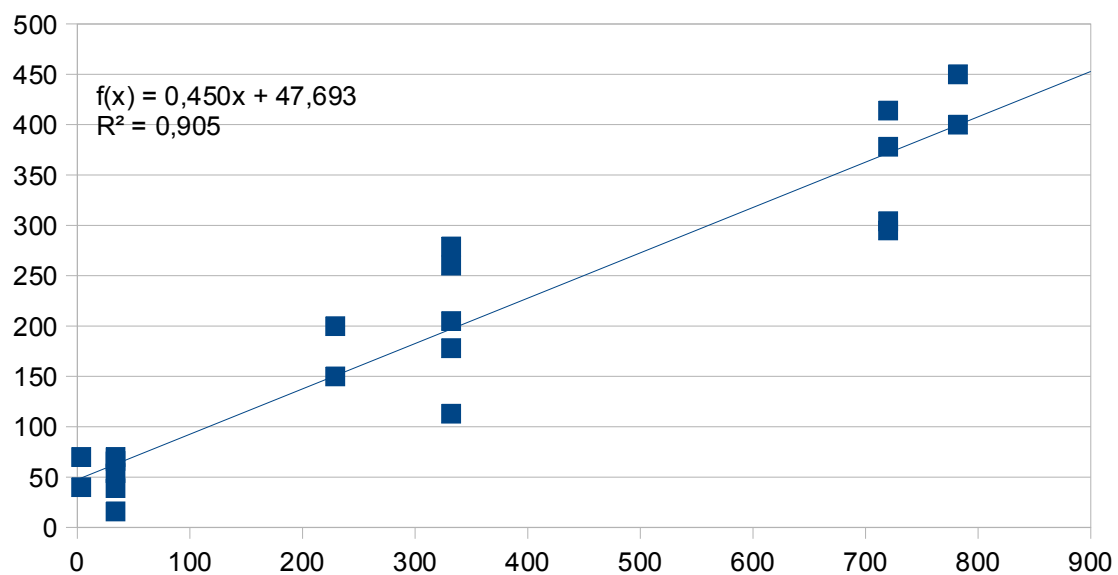

### Ni

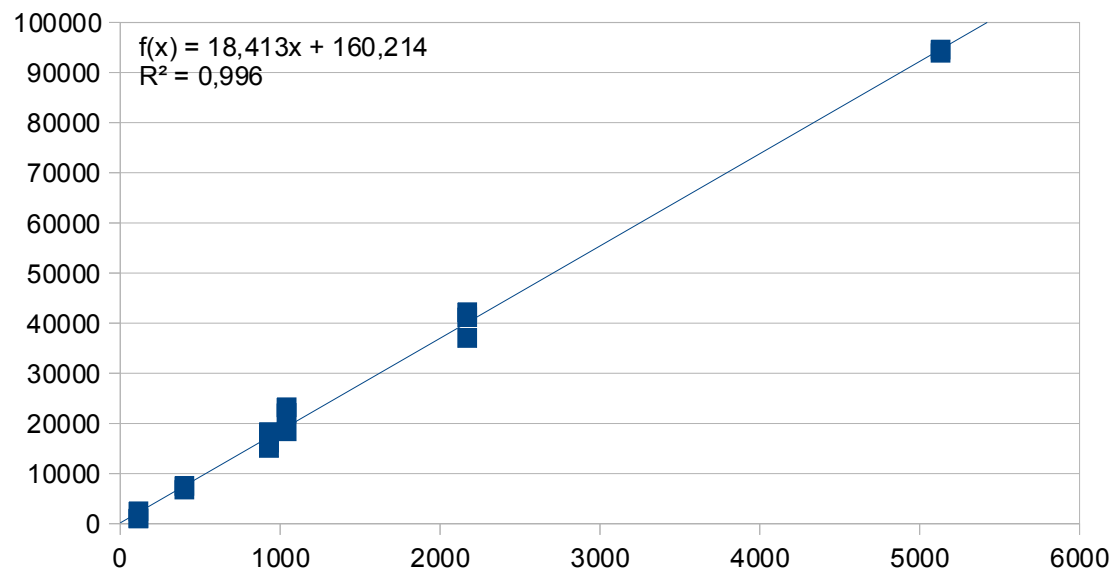

Cu

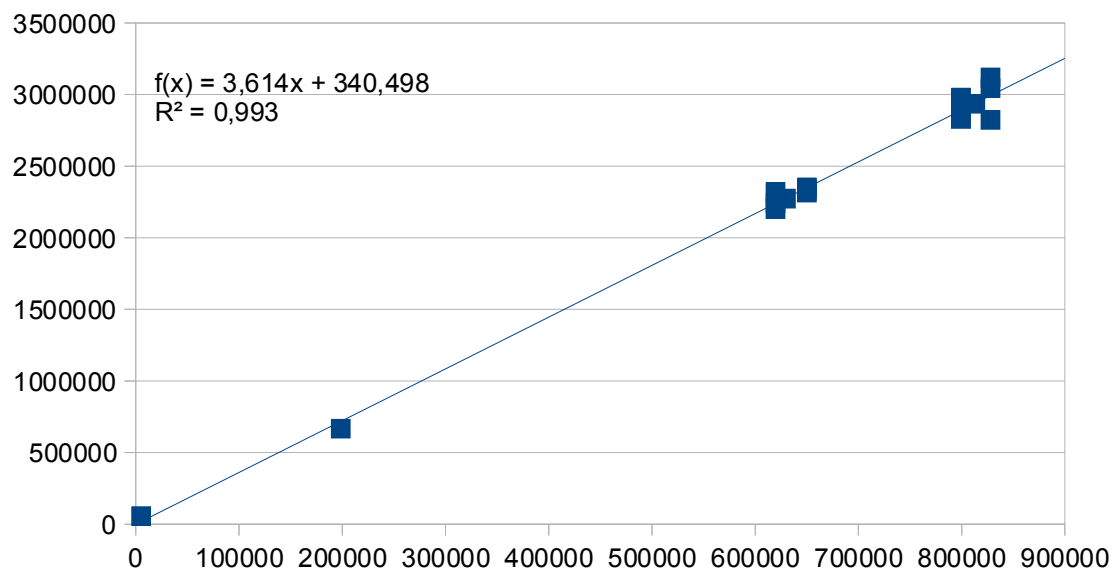

Zn

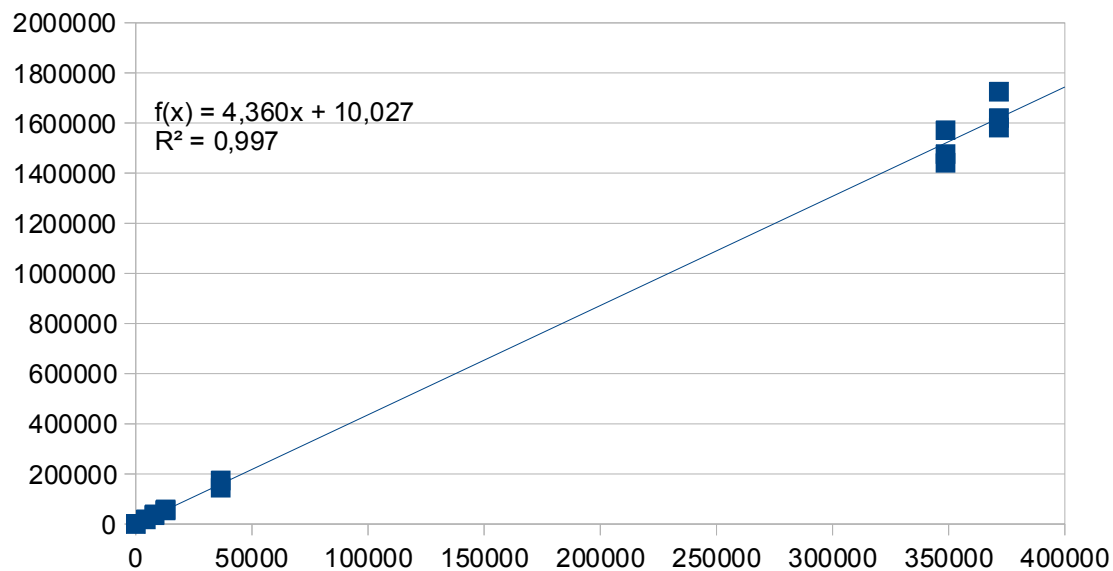

As

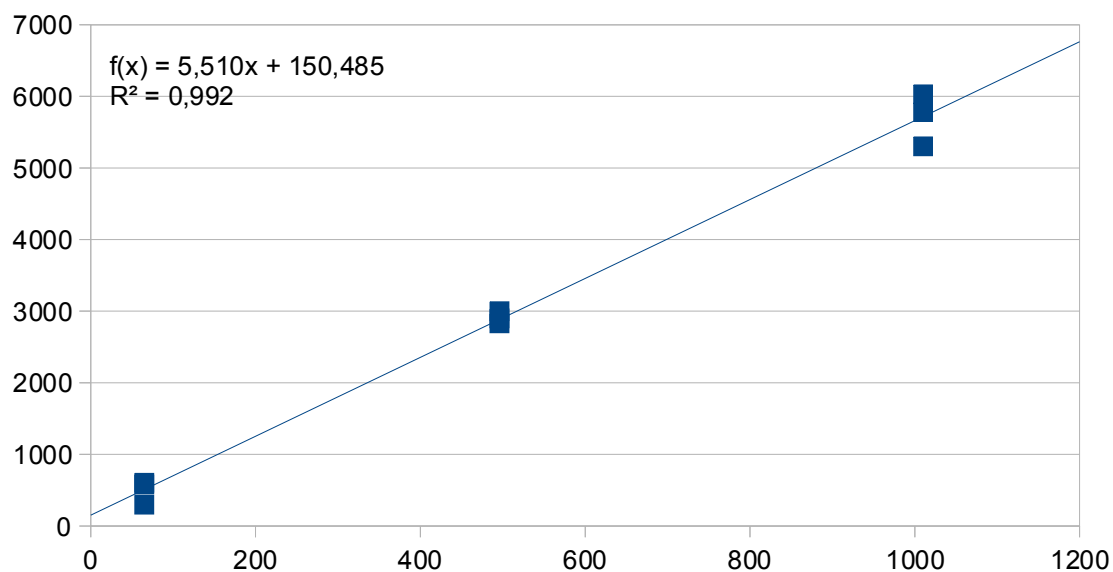

Ag

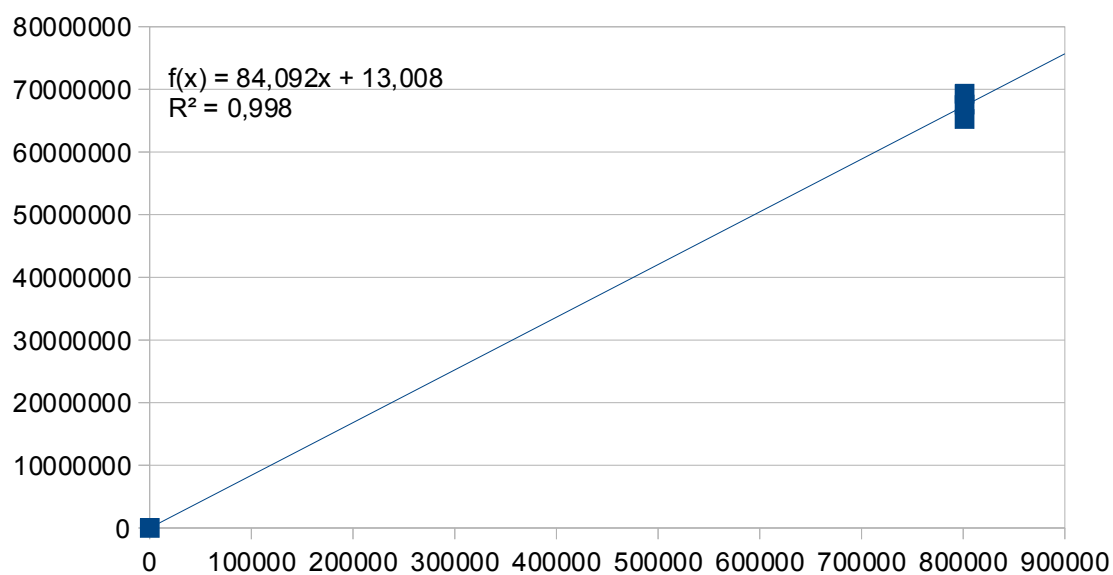

Sn

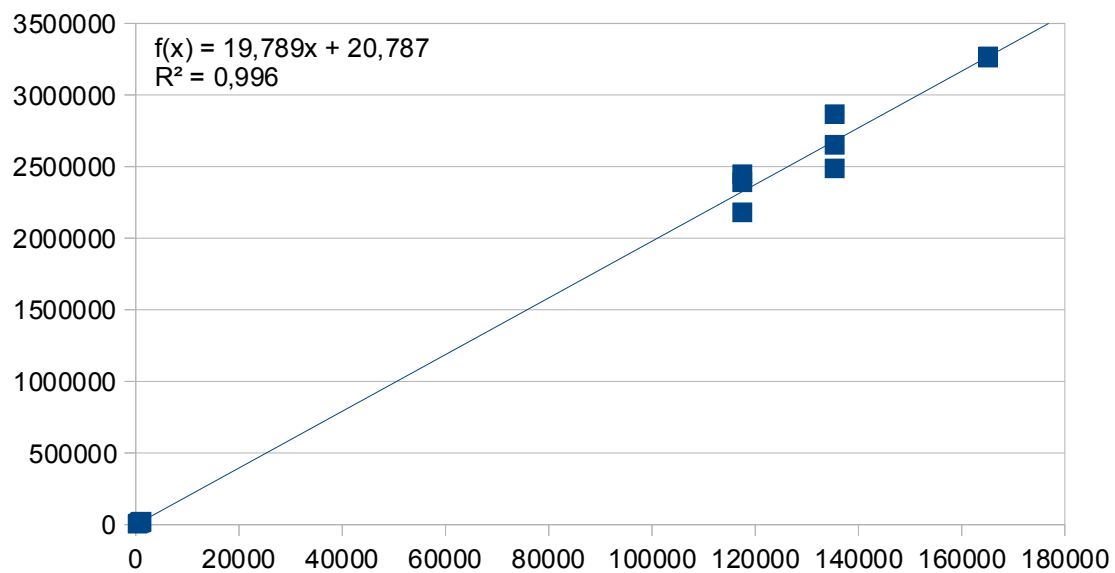

Sb

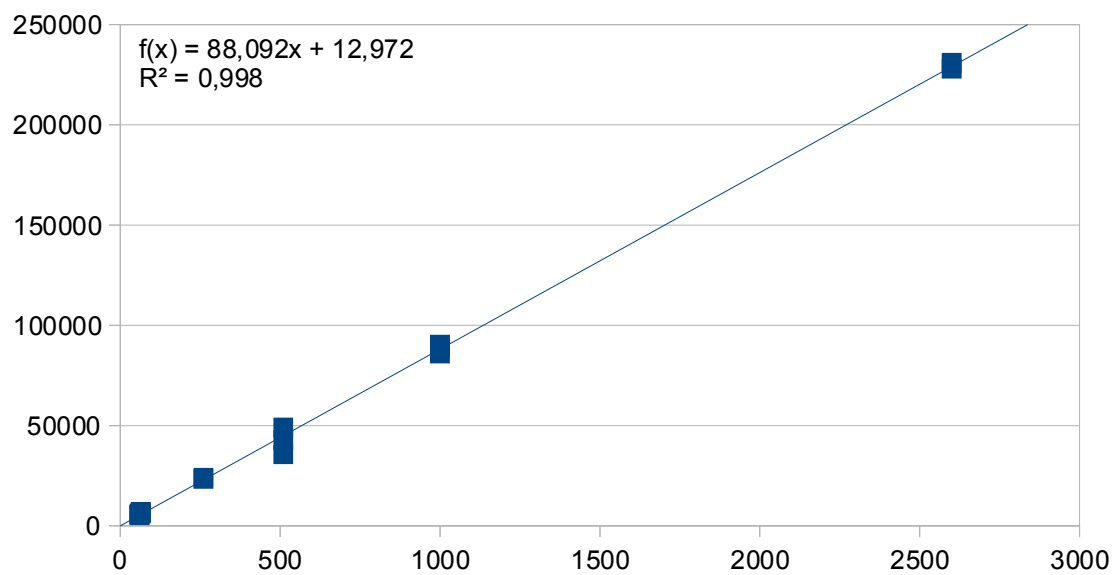

Pb

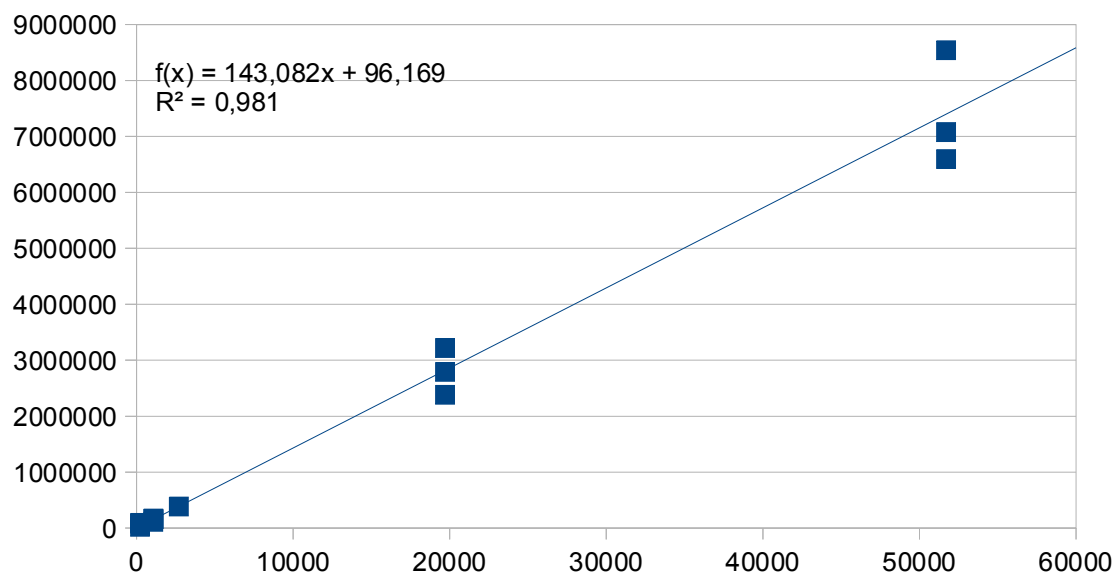

Supplement: c2nj40362e.pdf [file c2nj40362e.pdf]
